# Supplementary material for: Size Effect of Cu Particles on Interface Formation in Cu/ZnO Catalysts for Methanol Synthesis
Source: MDPI journal article supplement (doi:10.3390/catal13081190), 2023-08-08
Supplement: s1 [file s1]

# Size Effect of Cu Particles on Interface Formation in Cu/ZnO Catalysts for Methanol Synthesis

| Item      | Page |
|-----------|------|
| Figure S1 | 1    |
| Figure S2 | 2    |
| Figure S3 | 2    |
| Figure S4 | 3    |
| Figure S5 | 4    |
| Figure S6 | 5    |
| Figure S7 | 5    |
| Figure S8 | 6    |
| Figure S9 | 6    |
| Table S1  | 6    |

## XPS of catalysts

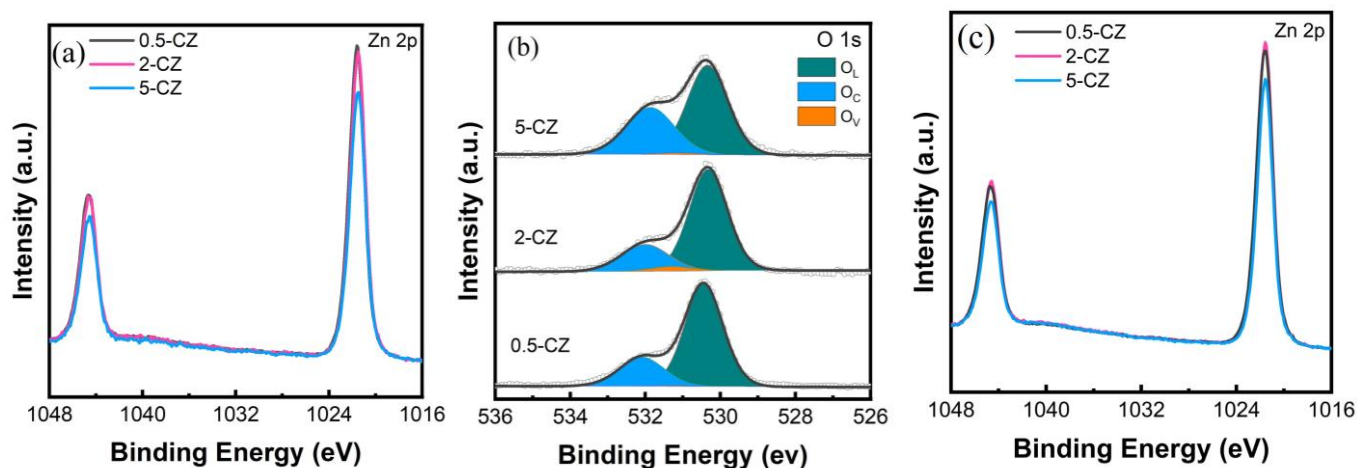

**Figure S1.** XPS spectra of (a) Zn 2p and (b) O 1s of the calcined Cu/ZnO catalysts. (c) XPS spectra of Zn 2p for reduced catalysts.

### SEM Images of Calcined Catalysts.

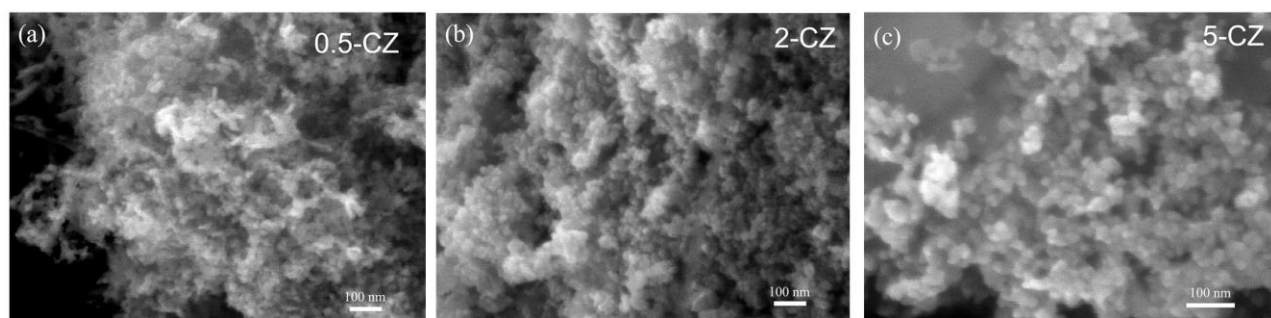

**Figure S2.** SEM images of calcined (a) 0.5-CZ, (b) 2-CZ and (c) 5-CZ catalysts.

### HR-TEM Images of Reduced Catalysts.

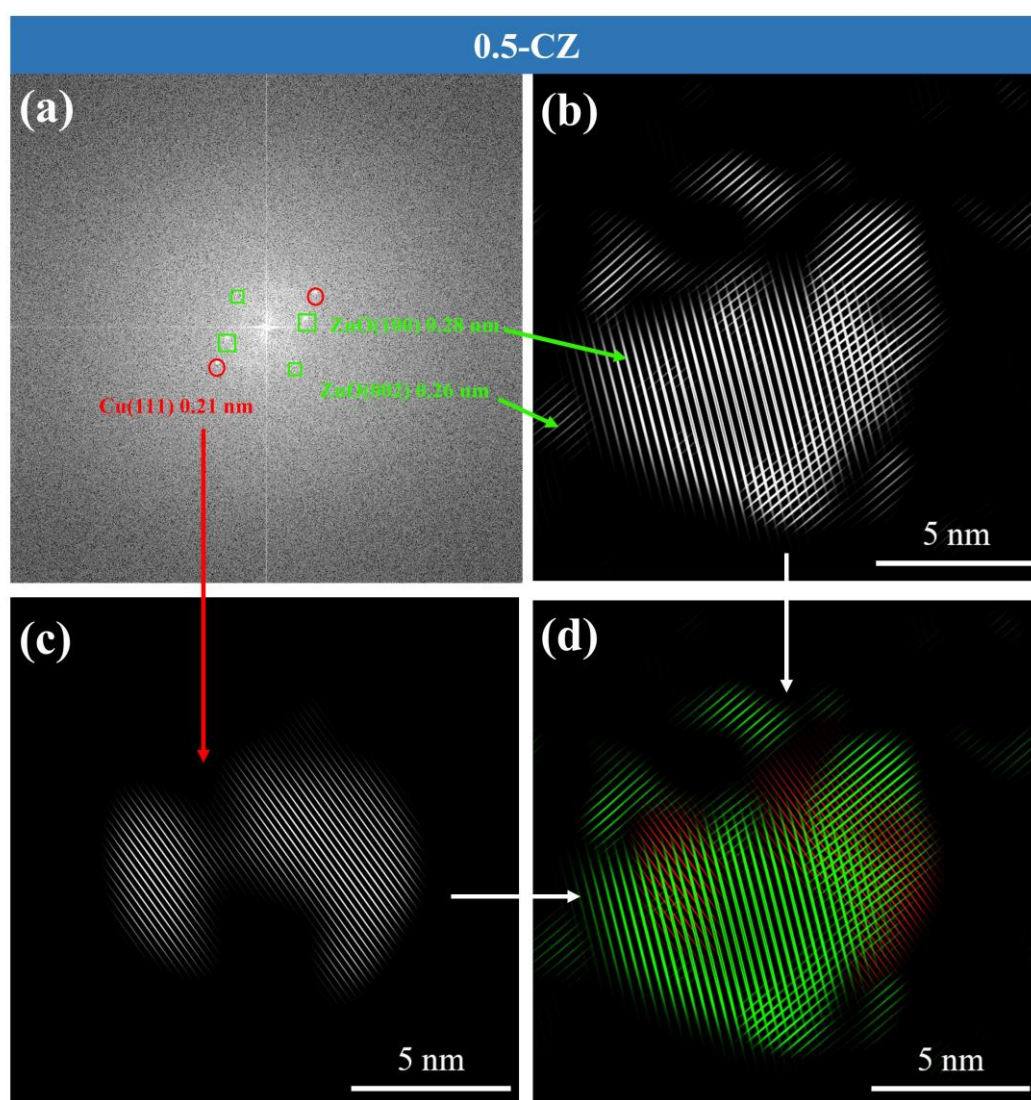

**Figure S3.** Extracted lattice features of HR-TEM Figure 4a. (a) Corresponding FFT patterns. (b-c) Fourier filtered lattice features of (b) ZnO species and (c) Cu species. (d) lattice features stained (ZnO-green, Cu-red).

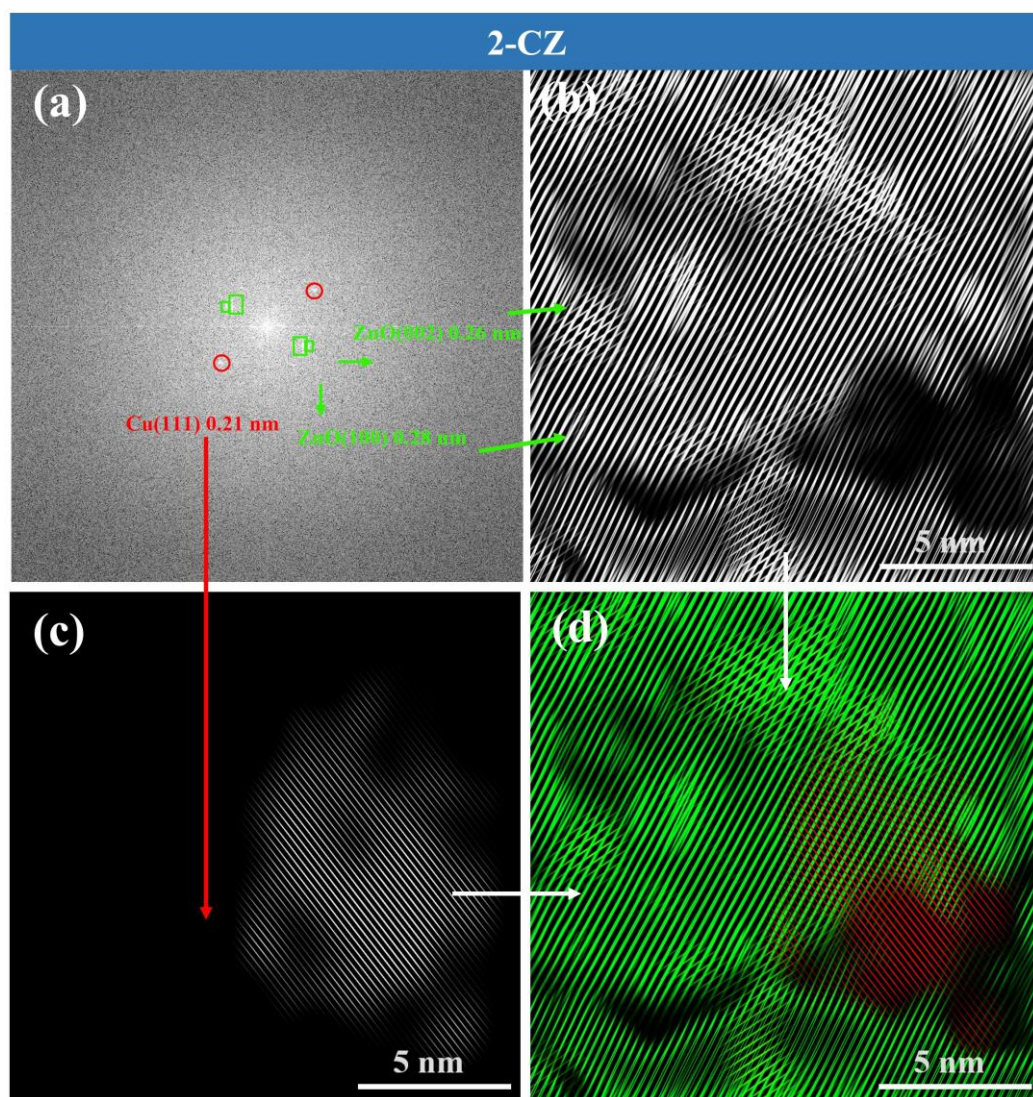

**Figure S4.** Extracted lattice features of HR-TEM Figure 4b. (a) Corresponding FFT patterns. (b-c) Fourier filtered lattice features of (b) ZnO species and (c) Cu species. (d) lattice features stained (ZnO-green, Cu-red)



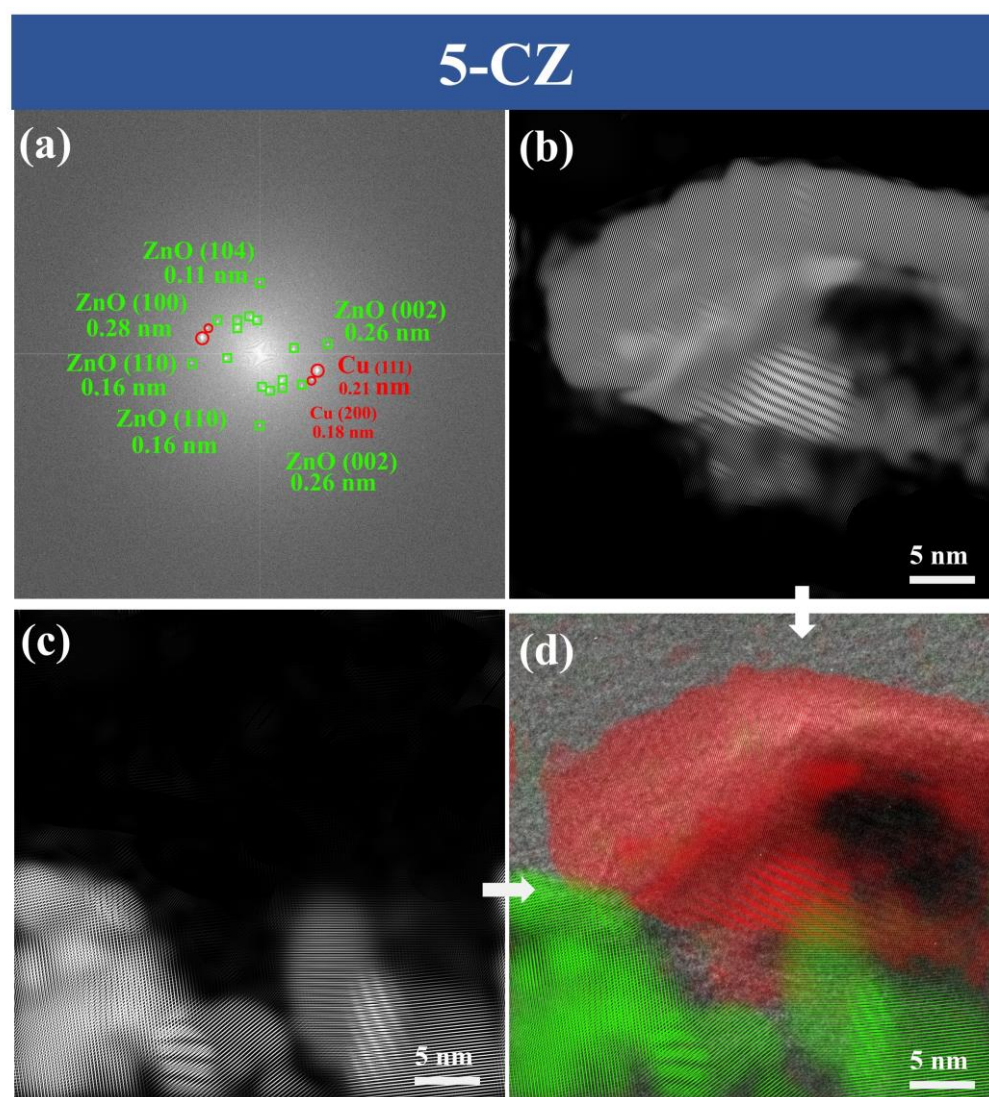

**Figure S5.** Extracted lattice features of HR-TEM Figure 4c. (a) Corresponding FFT patterns. (b-c) Fourier filtered lattice features of (b) ZnO species and (c) Cu species. (d) lattice features stained (ZnO-green, Cu-red).

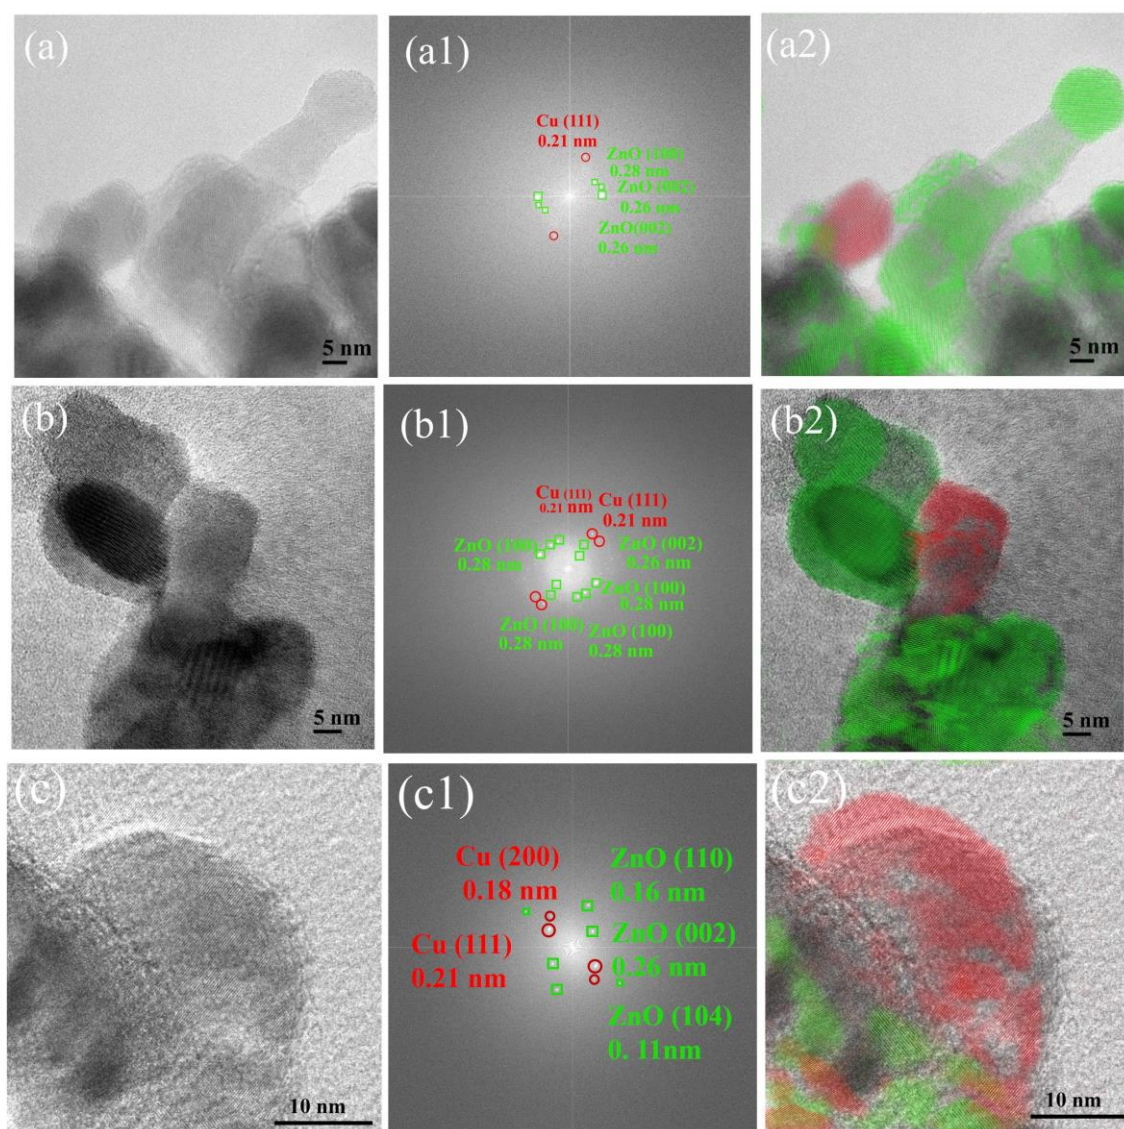

**Figure S6.** HR-TEM images for reduced Cu/ZnO catalysts (a) 0.5-CZ, (b) 2-CZ, (c) 5-CZ. (a1–c1) Corresponding FFT patterns and (a2–c2) Fourier-filtered Cu, ZnO lattice features stained (ZnO-green, Cu-red).

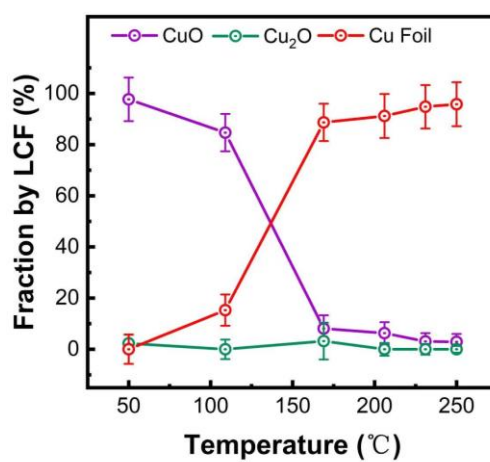

**Figure S7.** Comparison of the LCF (Linear Combination Fitting) results at Cu K-edge over the catalyst with 2 wt% Cu loading.

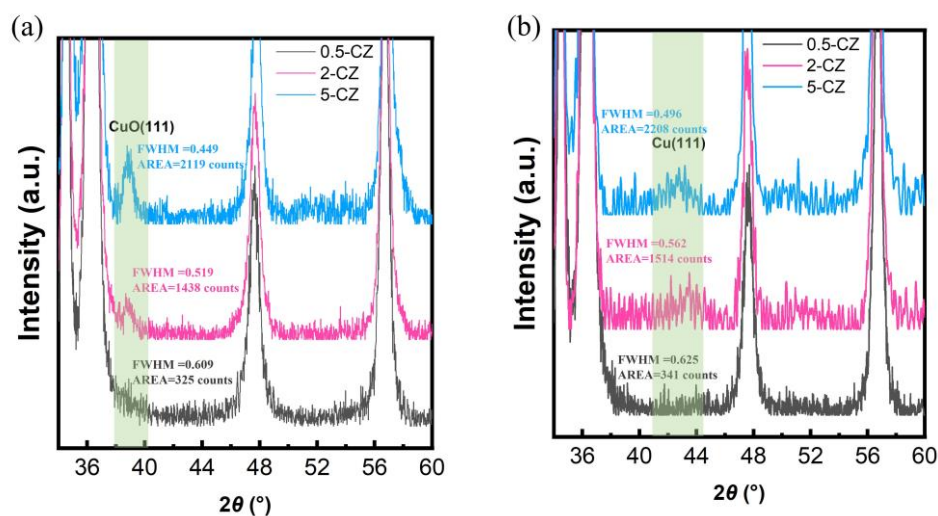

**Figure S8.** (a) XRD patterns of calcined catalysts with different Cu-loadings. (b) XRD patterns of reduced catalysts with different Cu-loadings. Each value was the standard deviation determined on the basis of at least three individual tests obtained by JADE.

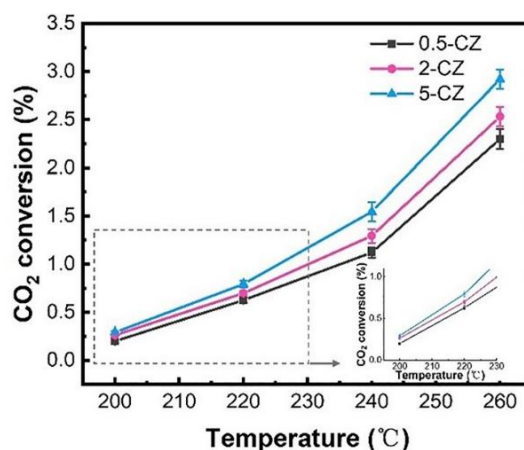

**Figure S9.** CO<sub>2</sub> conversion ( $X_{\text{CO}_2}$ ) of Cu/ZnO catalysts. Error bars for the activity represent the standard deviation from at least three parallel measurements.

**Table S1.** Carbon balance of the reaction. Catalyst 50 mg, H<sub>2</sub>/CO<sub>2</sub> = 3, GHSV = 12000 mL g<sub>cat</sub><sup>-1</sup> h<sup>-1</sup>, 1 MPa.

| Temperature/°C | Carbon balance of samples/% |      |      |
|----------------|-----------------------------|------|------|
|                | 0.5-CZ                      | 2-CZ | 5-CZ |
| 200            | 96.5                        | 93.7 | 96.6 |
| 220            | 92.5                        | 96.3 | 96.8 |
| 240            | 94.2                        | 95.0 | 94.2 |
| 260            | 93.4                        | 97.1 | 98.7 |
