# Supplementary material for: Size Effect of Cu Particles on Interface Formation in Cu/ZnO Catalysts for Methanol Synthesis
Source: MDPI journal article supplement (doi:10.3390/catal13081190), 2023-08-08
Supplement: s1 [file s1]

Archive with 1 entries (1 files):
- catalysts-2470601-SI.pdf
